# Supplementary material for: Concomitant polymorphs: structural studies on the trimorphic dithiadiazolyl radical, ClCNSSN
Source: Royal Society of Chemistry journal article supplement (doi:10.1039/b110922g), 2002-01-01
Supplement: b110922g.doc [file b110922g.doc]

**Supplementary Information**

## SUP-01 Electrostatic Potential maps

Previous theoretical studies on the radical **F3CCSNSCCF3** have indicated substantial variation in calculated point charges (Passmore et al.). The semi-empirical AM1 and PM3-calculated point charges are qualitatively similar for this system and exhibit similar variations.

### Calculated point charges

| Method | F | Exo-C | C | N | S |
| --- | --- | --- | --- | --- | --- |
| UB3PW91/6-31G* | -0.404 | 1.293 | -0.336 | -0.766 | 0.636 |
| UMPW1PW91/6-31+G* | -0.271 | 1.075 | -0.480 | -0.429 | 0.431 |
| Normal bond order analysis | -0.346 | 1.093 | -0.340 | -0.846 | 0.706 |
| MOPAC/PM3 | -0.125 | 0.435 | -0.323 | -0.454 | 0.481 |
| MOPAC/MNDO | -0.213 | 0.682 | -0.378 | -0.775 | 0.734 |
| MOPAC/AM1 | -0.143 | 0.499 | -0.460 | -0.806 | 0.804 |
